# Supplementary material for: Ultrahigh electrocatalytic activity with trace amounts of platinum loadings on free-standing mesoporous titanium nitride nanotube arrays for hydrogen evolution reactions
Source: Royal Society of Chemistry journal article supplement (doi:10.1039/d0nr01316a), 2020-01-01
Supplement: d0nr01316a1.pdf [file d0nr01316a1.pdf]

## Supplementary data

### Ultrahigh Electrocatalytic Activity with Trace Amount Platinum Loadings on Free-standing Mesoporous Titanium Nitride Nanotube Arrays for Hydrogen Evolution Reaction

Jiayang Zhao <sup>a</sup> #, Yan Zeng <sup>a</sup> #, Jiao Wang <sup>a</sup>, Qizhi Xu <sup>b</sup>, Rongsheng Chen <sup>a,\*</sup>, Hongwei Ni <sup>a</sup>, Gary J. Cheng <sup>c,\*</sup>

<sup>a</sup> The State Key Laboratory of Refractories and Metallurgy, Institute of Advanced Materials and Nanotechnology, School of Chemistry and Chemical Engineering, Wuhan University of Science and Technology, Wuhan 430081, China

<sup>b</sup> Department of Chemistry, Columbia University, New York, New York 10027, United States

<sup>c</sup> School of Industrial Engineering, Purdue University, West Lafayette, IN 47907-2023, United States

\* Corresponding authors.

E-mail addresses: [chenrs@wust.edu.cn](mailto:chenrs@wust.edu.cn) (R.S. Chen), [gjcheng@purdue.edu](mailto:gjcheng@purdue.edu) (G.J. Cheng)

# These authors contributed equally to this work.

**Figure S1**

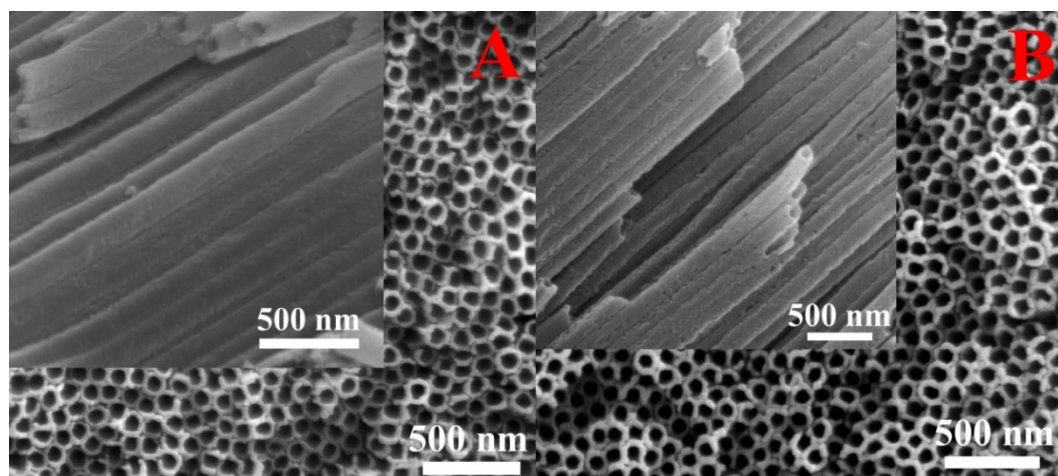

SEM images of the top-surface and cross-section (inset) morphology of TiN NTAs annealed in a tube furnace at 750 °C in  $\text{NH}_3$  flow for 1 h (A) and 6 h (B).

**Figure S2**

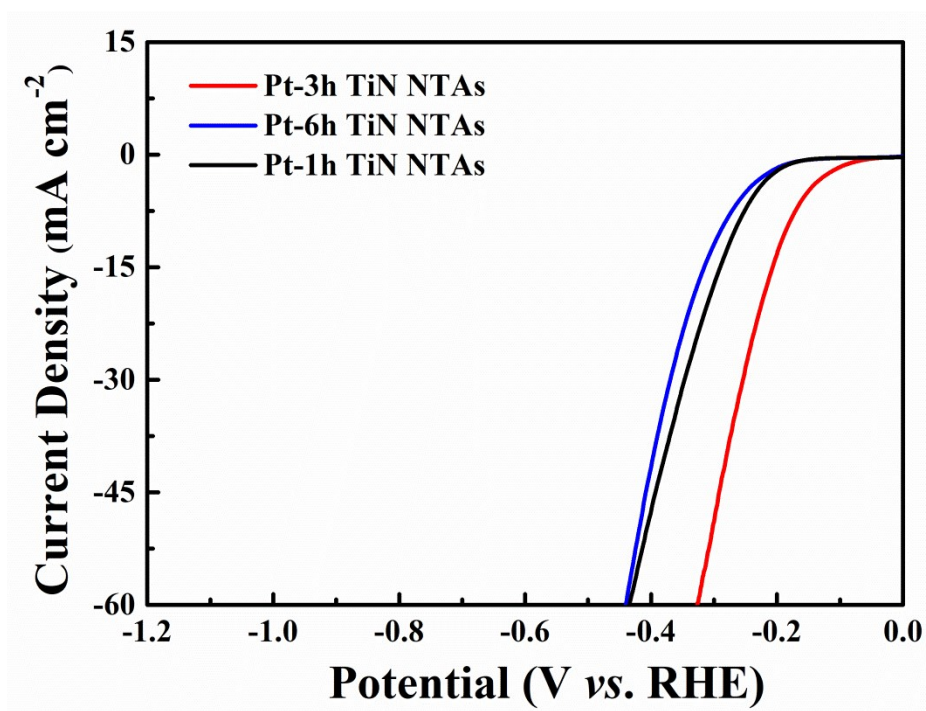

Polarization curves of electrodeposition of Pt species with successive 250 cycles on TiN NTAs treated in NH<sub>3</sub> flow for 1 h, 3 h and 6 h. The curves were recorded at a scan rate of 1 mV/s in 0.5 M H<sub>2</sub>SO<sub>4</sub> at room temperature.

**Figure S3**

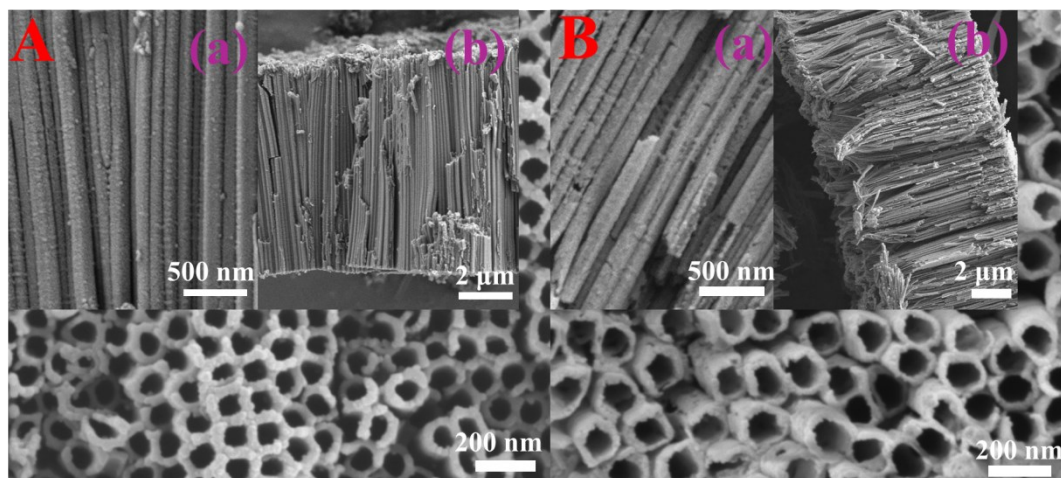

SEM images of the top-surface morphology of Pt-C/TiO<sub>2</sub> NTAs (A) and Pt-TiO<sub>2</sub> NTAs (B). Insets show cross-section morphology of the materials.

**Figure S4**

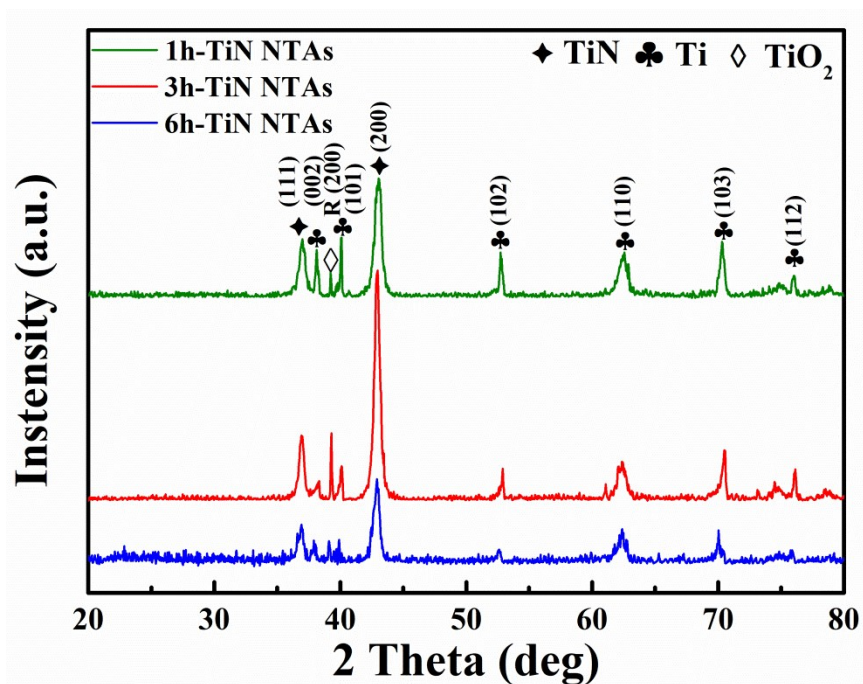

XRD patterns of TiN NTAs annealed in a tube furnace at 750 °C in  $\text{NH}_3$  flow for 1 h, 3 h and 6 h, where R means rutile.

**Figure S5**

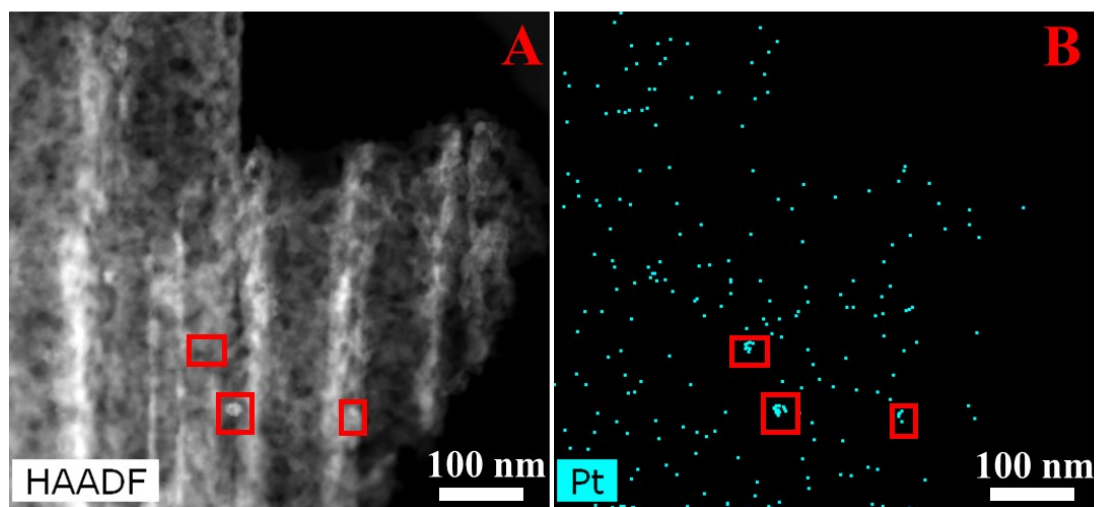

(A) TEM image of multiple nanotubes of Pt-TiN NTAs and corresponding platinum element mapping image (B). The boxes refer to the platinum particles.

Figure S6

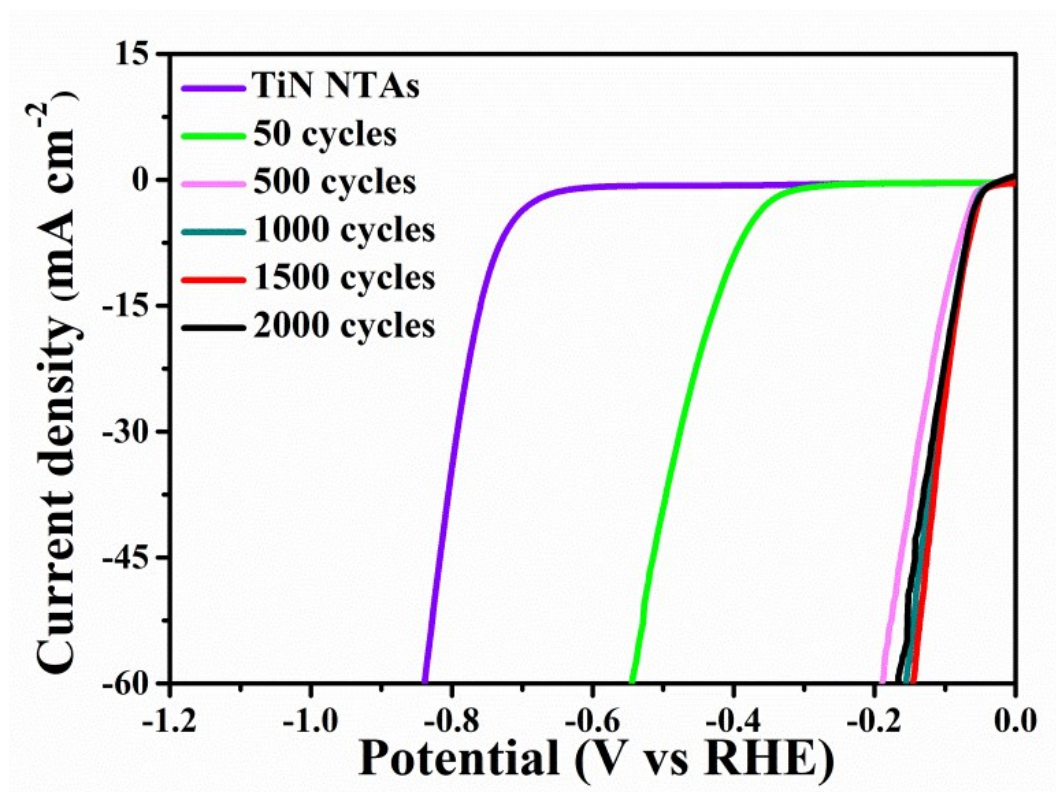

Polarization curves of Pt-TiN NTAs with different numbers of electrochemical cycles. The curves were recorded at a scan rate of 1 mV/s in 0.5 M H<sub>2</sub>SO<sub>4</sub> at room temperature.



Figure S7

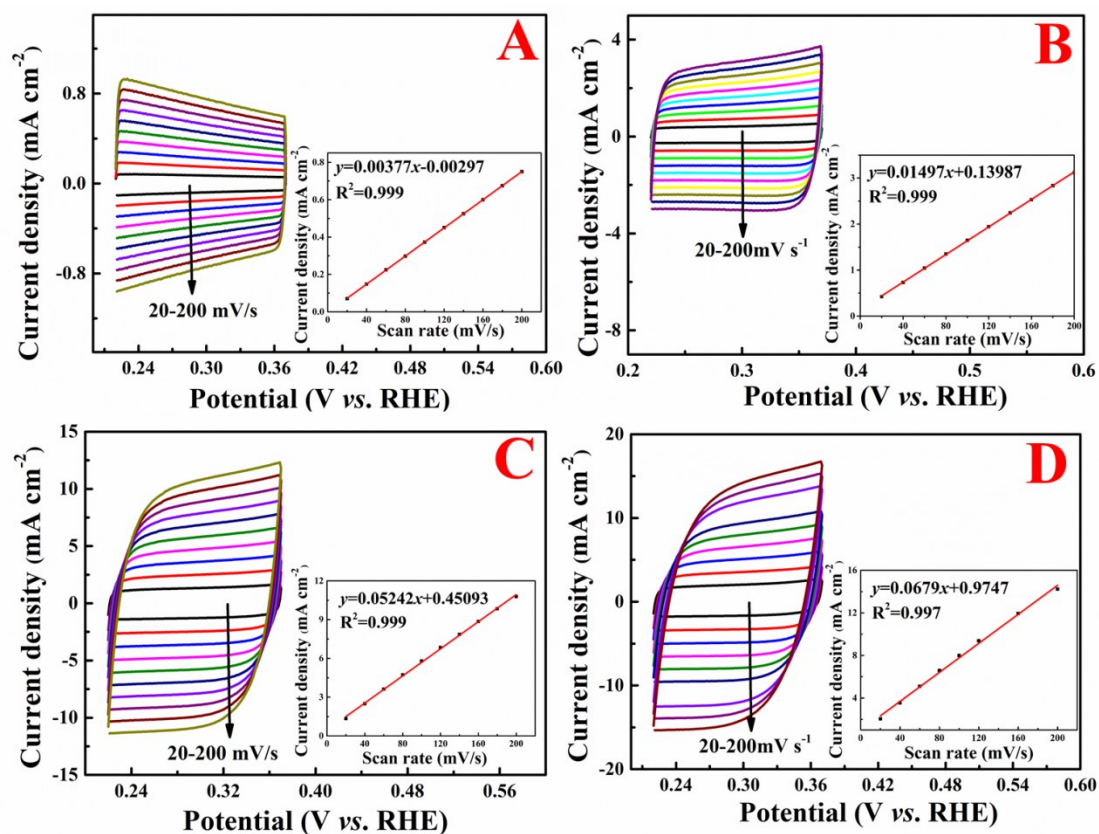

CV curves of TiO<sub>2</sub> NTAs (A), Pt-C/TiO<sub>2</sub> NTAs (B), TiN NTAs (C) and Pt-TiN NTAs (D) at varying rates from 20 to 200 mV s<sup>-1</sup> in 0.5 M H<sub>2</sub>SO<sub>4</sub> solution. Insets in the four figures show the linear relationship of the current density variation and scan rates.
